# Supplementary material for: The infrared spectra of protic ionic liquids: performances of different computational models to predict hydrogen bonds and conformer evolution
Source: Royal Society of Chemistry journal article supplement (doi:10.1039/d0cp00907e), 2020-01-01
Supplement: d0cp00907e1.pdf [file d0cp00907e1.pdf]

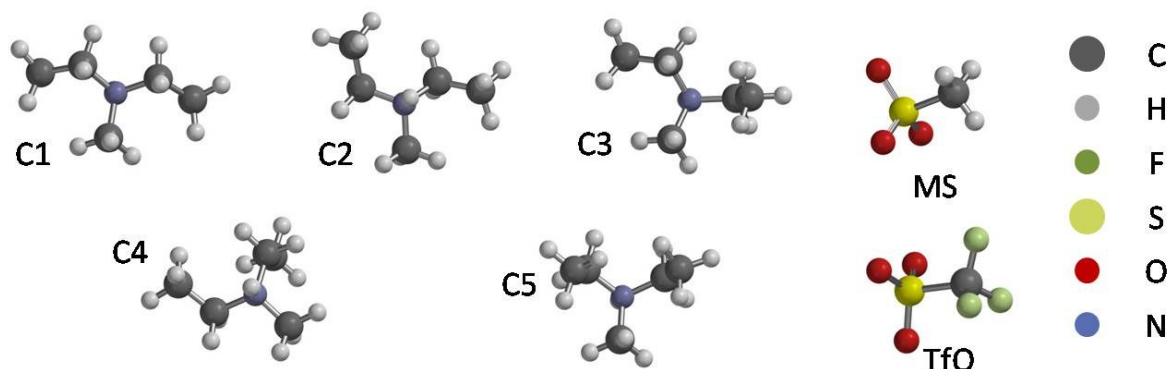

**Fig. S1.** Geometric structures of the two methanesulphonate (MS) and trifluoromethanesulfonate (TfO) anions and of the five conformers of the diethylmethylammonium (DEMA) cation, calculated as isolated ions in vacuum at the B3LYP level of theory with the 6-31G\*\* basis set.

**Table S1.** DEMA cation conformers (calculated as isolated ions at the B3LYP level of theory with the 6-31G\*\* basis set) and their relative energies.

| Conformer | $\Delta E$ (kJ/mol) | ZPE (kJ/mol) | Entropy (J/mol•K) | Enthalpy (a.u) | Gibbs Energy (a.u) |
|-----------|---------------------|--------------|-------------------|----------------|--------------------|
| C1        | 0.0                 | 506.54       | 366.21            | -253.307788    | -253.349375        |
| C2        | 0.1                 | 507.29       | 365.45            | -253.307468    | -253.348968        |
| C3        | 3.1                 | 508.83       | 356.74            | -253.305829    | -253.346340        |
| C4        | 3.5                 | 507.35       | 361.14            | -253.306146    | -253.347157        |
| C5        | 16.0                | 509.40       | 353.81            | -253.300678    | -253.340856        |

**Table S2.** Infrared vibrational frequencies ( $\omega$  in  $\text{cm}^{-1}$ ) and intensities ( $I$  in  $\text{km/mol}$ ) of the MS and TfO anions and of the five conformers of DEMA calculated at the B3LYP level of theory with the 6-31G\*\* basis set.

| ConfC1 DEMA |       | ConfC2 DEMA |       | ConfC3 DEMA |       | ConfC4 DEMA |       | ConfC5 DEMA |       | MS       |        | TfO      |        |
|-------------|-------|-------------|-------|-------------|-------|-------------|-------|-------------|-------|----------|--------|----------|--------|
| $\omega$    | $I$   | $\omega$ | $I$    | $\omega$ | $I$    |
| 70          | 0.16  | 54          | 0.55  | 98          | 0.75  | 62          | 0.63  | 100         | 0.06  | 268      | 0      | 62       | 0      |
| 74          | 1.35  | 104         | 0.56  | 114         | 0.49  | 118         | 0.31  | 132         | 0.37  | 307      | 0.47   | 195      | 1.3    |
| 204         | 0.03  | 197         | 0.07  | 228         | 0.08  | 226         | 0.04  | 246         | 0.01  | 307      | 0.48   | 195      | 1.29   |
| 215         | 0.81  | 225         | 0.18  | 232         | 0.55  | 238         | 0.27  | 263         | 0.04  | 503      | 15.62  | 293      | 0.01   |
| 244         | 0.6   | 251         | 0.51  | 268         | 0.46  | 274         | 0.23  | 271         | 0.09  | 503      | 15.58  | 333      | 0.13   |
| 273         | 0.23  | 277         | 1.15  | 293         | 0.13  | 279         | 0.25  | 289         | 0.68  | 518      | 21.76  | 333      | 0.14   |
| 349         | 0.82  | 330         | 0.29  | 329         | 0.79  | 309         | 0.12  | 320         | 0.05  | 725      | 118.87 | 500      | 14.99  |
| 392         | 0.68  | 406         | 0.22  | 401         | 0.69  | 388         | 0.41  | 393         | 1.44  | 958      | 0.34   | 500      | 14.97  |
| 449         | 0.04  | 452         | 0.63  | 427         | 1.11  | 448         | 1.35  | 431         | 0.11  | 958      | 0.33   | 559      | 7.67   |
| 464         | 1.26  | 478         | 1.15  | 566         | 0.87  | 530         | 1.89  | 603         | 1.26  | 1000     | 136.1  | 559      | 7.68   |
| 764         | 3.93  | 750         | 2.49  | 751         | 1.64  | 717         | 4.06  | 693         | 2.24  | 1221     | 289.92 | 623      | 166.15 |
| 798         | 0.02  | 806         | 7.57  | 816         | 6.98  | 788         | 11.6  | 805         | 7.37  | 1221     | 290.06 | 741      | 7.42   |
| 832         | 7.43  | 831         | 4.55  | 820         | 8.51  | 829         | 2.7   | 826         | 7.64  | 1337     | 5.81   | 994      | 150.78 |
| 861         | 24.58 | 870         | 13.32 | 865         | 10.55 | 859         | 4.36  | 846         | 6.49  | 1485     | 0.08   | 1181     | 132.86 |
| 964         | 1.44  | 972         | 9.32  | 957         | 1.9   | 966         | 9.36  | 956         | 1.13  | 1485     | 0.08   | 1181     | 132.85 |
| 1000        | 46.05 | 1012        | 41.1  | 1013        | 35.1  | 1013        | 18.02 | 1018        | 33.88 | 3050     | 21.65  | 1227     | 91.96  |
| 1036        | 14.62 | 1024        | 17.24 | 1025        | 16.82 | 1023        | 26.79 | 1030        | 15.72 | 3146     | 32.67  | 1252     | 358.43 |
| 1060        | 10.57 | 1061        | 3.68  | 1068        | 2.63  | 1058        | 2.83  | 1065        | 1.33  | 3146     | 32.52  | 1252     | 358.58 |
| 1069        | 0.62  | 1074        | 4.96  | 1071        | 2.8   | 1071        | 1.79  | 1073        | 8.67  |          |        |          |        |
| 1102        | 0.03  | 1099        | 0.18  | 1105        | 0.15  | 1101        | 1.34  | 1114        | 0.24  |          |        |          |        |
| 1168        | 10.11 | 1188        | 5.22  | 1179        | 5.3   | 1192        | 4.77  | 1183        | 6.24  |          |        |          |        |
| 1219        | 0.03  | 1206        | 2.56  | 1219        | 4.38  | 1204        | 5.79  | 1215        | 3.42  |          |        |          |        |
| 1234        | 0.71  | 1229        | 0.79  | 1230        | 1.55  | 1219        | 1.65  | 1223        | 0.15  |          |        |          |        |
| 1299        | 2.18  | 1301        | 0.97  | 1317        | 13.17 | 1306        | 4.16  | 1346        | 0.44  |          |        |          |        |
| 1358        | 4.62  | 1350        | 4.13  | 1341        | 1.28  | 1349        | 0.89  | 1357        | 31.53 |          |        |          |        |

|      |       |      |       |      |       |      |       |      |       |  |  |  |  |
|------|-------|------|-------|------|-------|------|-------|------|-------|--|--|--|--|
| 1363 | 0.34  | 1395 | 2.07  | 1375 | 14.22 | 1381 | 11.85 | 1368 | 2.57  |  |  |  |  |
| 1415 | 50.53 | 1407 | 6.06  | 1402 | 8.02  | 1401 | 2.13  | 1408 | 13.73 |  |  |  |  |
| 1415 | 0.92  | 1428 | 33.48 | 1436 | 16.23 | 1421 | 15.13 | 1432 | 13.42 |  |  |  |  |
| 1436 | 8.02  | 1437 | 8.89  | 1442 | 7.75  | 1433 | 30.61 | 1439 | 8.49  |  |  |  |  |
| 1439 | 12.28 | 1444 | 10.39 | 1446 | 14.83 | 1442 | 5.49  | 1465 | 16.11 |  |  |  |  |
| 1452 | 3.86  | 1448 | 9.08  | 1468 | 16.01 | 1462 | 10.45 | 1469 | 9.84  |  |  |  |  |
| 1466 | 12.13 | 1467 | 10.66 | 1473 | 7.99  | 1468 | 6.91  | 1470 | 3.5   |  |  |  |  |
| 1491 | 0.06  | 1493 | 5.96  | 1499 | 3.15  | 1492 | 18.37 | 1498 | 6.88  |  |  |  |  |
| 1497 | 27.13 | 1502 | 16.84 | 1502 | 3.39  | 1497 | 5.44  | 1502 | 5.49  |  |  |  |  |
| 1504 | 2.08  | 1507 | 1.23  | 1509 | 18.35 | 1506 | 5.4   | 1506 | 5.89  |  |  |  |  |
| 1506 | 3.23  | 1510 | 7.91  | 1513 | 8.51  | 1511 | 10.98 | 1512 | 24.62 |  |  |  |  |
| 1510 | 23.93 | 1513 | 11.02 | 1517 | 25.27 | 1516 | 7.07  | 1520 | 20.39 |  |  |  |  |
| 1516 | 7.86  | 1519 | 24.46 | 1522 | 22.89 | 1519 | 26.3  | 1523 | 11.79 |  |  |  |  |
| 1528 | 42.52 | 1525 | 34.03 | 1529 | 16.27 | 1524 | 36.71 | 1529 | 13.74 |  |  |  |  |
| 1529 | 7.15  | 1528 | 16.01 | 1532 | 9.28  | 1529 | 2.07  | 1534 | 9.98  |  |  |  |  |
| 3061 | 0.01  | 3062 | 3.29  | 3062 | 3.6   | 3062 | 2.85  | 3075 | 0.83  |  |  |  |  |
| 3061 | 6.59  | 3063 | 3.73  | 3074 | 1.83  | 3072 | 1.76  | 3079 | 2.03  |  |  |  |  |
| 3090 | 1.28  | 3094 | 1.37  | 3091 | 5.57  | 3092 | 0.26  | 3087 | 4.08  |  |  |  |  |
| 3097 | 7.12  | 3097 | 3.14  | 3099 | 3.93  | 3097 | 7.22  | 3090 | 6.7   |  |  |  |  |
| 3102 | 0.2   | 3104 | 3.15  | 3103 | 0.27  | 3100 | 1.88  | 3097 | 0.52  |  |  |  |  |
| 3133 | 0.15  | 3133 | 2.07  | 3134 | 2.92  | 3133 | 2.9   | 3137 | 0.34  |  |  |  |  |
| 3134 | 5.1   | 3138 | 4.57  | 3139 | 0.31  | 3143 | 1.34  | 3141 | 0.5   |  |  |  |  |
| 3146 | 0.14  | 3146 | 0.97  | 3147 | 1.84  | 3145 | 0.84  | 3145 | 1.5   |  |  |  |  |
| 3147 | 2.17  | 3153 | 1.96  | 3151 | 1.62  | 3150 | 3.47  | 3148 | 6.06  |  |  |  |  |
| 3158 | 0.29  | 3159 | 7.63  | 3161 | 11.74 | 3160 | 7.16  | 3167 | 6.17  |  |  |  |  |
| 3162 | 14.19 | 3174 | 5.88  | 3166 | 4.65  | 3166 | 8.22  | 3178 | 10.29 |  |  |  |  |
| 3199 | 0.67  | 3190 | 0.36  | 3198 | 0.26  | 3189 | 0.35  | 3185 | 0.43  |  |  |  |  |
| 3213 | 0.09  | 3207 | 0.62  | 3212 | 0.32  | 3203 | 0.32  | 3217 | 0.23  |  |  |  |  |
| 3422 | 29.54 | 3425 | 29.22 | 3435 | 37.95 | 3437 | 38.55 | 3445 | 48.63 |  |  |  |  |

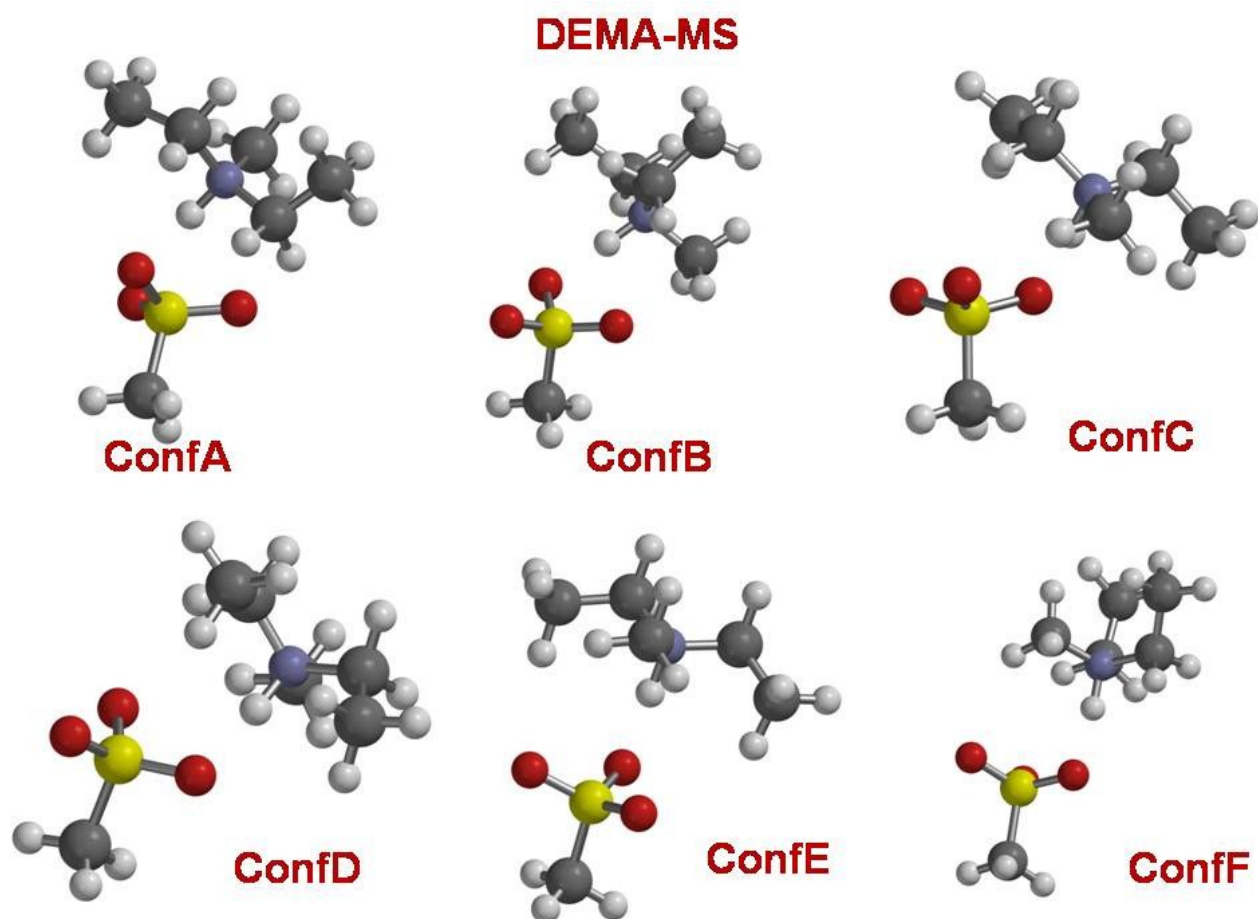

**Fig. S2.** Geometric structures of the six conformers of DEMAsulfonamide, calculated as a ionic couple in a polar medium at the  $\omega$ B97X-D level of theory with the 6-31G\*\* basis set.

**Table S3.** Conformers of DEMAsulfonamide (calculated at the  $\omega$ B97X-D level of theory with the 6-31G\*\* basis set and a polar medium) and their relative energies.

| Conformer | $\Delta E$ (kJ/mol) | ZPE (kJ/mol) | Entropy (J/mol•K) | Enthalpy (a.u) | Gibbs Energy (a.u) |
|-----------|---------------------|--------------|-------------------|----------------|--------------------|
| C         | 0.0                 | 649.35       | 519.38            | -917.077480    | -917.136460        |
| B         | 0.2                 | 649.22       | 523.74            | -917.077494    | -917.136969        |
| A         | 2.2                 | 649.19       | 523.67            | -917.076765    | -917.136232        |
| E         | 2.8                 | 649.06       | 502.71            | -917.076559    | -917.133646        |
| D         | 5.4                 | 650.53       | 484.38            | -917.075015    | -917.130021        |
| F         | 14.6                | 650.69       | 493.52            | -917.071553    | -917.127596        |

**Table S4.** Infrared vibrational frequencies ( $\omega$  in  $\text{cm}^{-1}$ ) and intensities ( $I$  in  $\text{km/mol}$ ) of the six conformers of DEMAsulfonamide calculated at the  $\omega$ B97X-D level of theory with the 6-31G\*\* basis set and a polar medium.

| ConfA    |       | ConfB    |       | ConfC    |       | ConfD    |      | ConfE    |       | ConfF    |       |
|----------|-------|----------|-------|----------|-------|----------|------|----------|-------|----------|-------|
| $\omega$ | $I$   | $\omega$ | $I$   | $\omega$ | $I$   | $\omega$ | $I$  | $\omega$ | $I$   | $\omega$ | $I$   |
| 26       | 9.72  | 17       | 9.74  | 14       | 10.26 | 10       | 1.04 | 9        | 1.64  | 12       | 1.68  |
| 31       | 11.69 | 36       | 8.32  | 47       | 10.96 | 42       | 6.69 | 17       | 1     | 23       | 0.58  |
| 56       | 1.2   | 53       | 1.04  | 58       | 0.88  | 70       | 5.54 | 49       | 9.77  | 54       | 7.51  |
| 66       | 10.02 | 74       | 13.51 | 87       | 7.1   | 85       | 0.43 | 64       | 12.26 | 70       | 24.36 |
| 84       | 17.01 | 85       | 10.09 | 93       | 5.47  | 98       | 6.75 | 78       | 7.22  | 79       | 6.94  |

|      |        |      |        |      |        |      |        |      |        |      |        |
|------|--------|------|--------|------|--------|------|--------|------|--------|------|--------|
| 92   | 1.23   | 90   | 6.49   | 108  | 10.51  | 105  | 14.58  | 96   | 0.32   | 106  | 1.55   |
| 109  | 2.63   | 133  | 1.98   | 126  | 2.75   | 151  | 35.94  | 111  | 3.85   | 141  | 2.63   |
| 158  | 42.21  | 155  | 49.44  | 160  | 48.29  | 172  | 14.59  | 159  | 40.83  | 163  | 43.35  |
| 208  | 3.65   | 213  | 0.58   | 224  | 2.03   | 230  | 0.09   | 222  | 3.07   | 237  | 0.99   |
| 231  | 2.32   | 248  | 0.31   | 242  | 1.99   | 239  | 0.03   | 238  | 2.38   | 258  | 0.01   |
| 257  | 0.06   | 248  | 0.04   | 245  | 0.64   | 251  | 0.14   | 260  | 0.01   | 284  | 0.13   |
| 281  | 0.82   | 260  | 1.48   | 267  | 0.86   | 256  | 2.53   | 276  | 2.41   | 307  | 1.62   |
| 300  | 0.89   | 293  | 0.15   | 275  | 1.28   | 312  | 0.22   | 286  | 0.06   | 310  | 0.47   |
| 328  | 1.73   | 328  | 1.44   | 330  | 1.43   | 329  | 1.41   | 327  | 1.34   | 326  | 1.39   |
| 339  | 5.08   | 338  | 7.68   | 342  | 8.77   | 343  | 7.78   | 352  | 8.49   | 341  | 0.28   |
| 344  | 7.05   | 351  | 6.13   | 353  | 2.82   | 361  | 5.61   | 392  | 1.22   | 358  | 10.55  |
| 419  | 0.6    | 422  | 0.91   | 432  | 2.5    | 423  | 0.73   | 416  | 0.53   | 416  | 0.86   |
| 451  | 3.79   | 479  | 0.69   | 469  | 7.65   | 465  | 3.66   | 466  | 17.37  | 449  | 0.24   |
| 513  | 44.36  | 513  | 47.01  | 502  | 5.59   | 510  | 19.04  | 499  | 0.08   | 508  | 37.95  |
| 517  | 53.13  | 520  | 53.73  | 516  | 44.61  | 515  | 50.49  | 510  | 40.14  | 513  | 41.25  |
| 543  | 126.63 | 541  | 121.26 | 518  | 44.77  | 522  | 20.75  | 515  | 36.66  | 548  | 134.68 |
| 577  | 17.42  | 563  | 23.25  | 545  | 138.87 | 547  | 138.33 | 548  | 142.59 | 625  | 17.51  |
| 779  | 92.18  | 771  | 2.47   | 778  | 101.07 | 780  | 100.59 | 781  | 96.59  | 755  | 2.39   |
| 792  | 4.58   | 779  | 97.32  | 787  | 4.41   | 792  | 7.36   | 804  | 13.53  | 782  | 99.2   |
| 817  | 16     | 812  | 13.89  | 815  | 8.54   | 804  | 12.16  | 811  | 0.04   | 809  | 7.88   |
| 834  | 11.26  | 841  | 12.65  | 850  | 22.29  | 848  | 16.99  | 851  | 17.82  | 826  | 15.03  |
| 913  | 1.54   | 914  | 0.36   | 924  | 1.76   | 922  | 0.86   | 920  | 5.92   | 902  | 0.94   |
| 999  | 11.39  | 996  | 14.66  | 995  | 15.71  | 995  | 9.8    | 1001 | 14.63  | 996  | 22.74  |
| 999  | 7.37   | 999  | 6.3    | 1001 | 5.23   | 998  | 4.34   | 1004 | 3.97   | 1003 | 9.79   |
| 1002 | 2.33   | 1014 | 9.59   | 1016 | 10.33  | 1034 | 39.84  | 1011 | 10.74  | 1005 | 2.18   |
| 1043 | 329.3  | 1040 | 347.19 | 1039 | 349.62 | 1042 | 329.71 | 1039 | 363.51 | 1040 | 384.01 |
| 1062 | 54.45  | 1060 | 24.74  | 1059 | 55.38  | 1062 | 33.59  | 1048 | 71.16  | 1072 | 40.54  |
| 1073 | 14.36  | 1075 | 19.79  | 1080 | 16.58  | 1072 | 38.75  | 1086 | 13.05  | 1081 | 17.18  |
| 1099 | 20.75  | 1095 | 12.79  | 1096 | 6.07   | 1096 | 6.88   | 1092 | 8.47   | 1104 | 15.27  |
| 1106 | 5.97   | 1107 | 2.5    | 1107 | 3.9    | 1105 | 15.56  | 1116 | 9.89   | 1112 | 5.69   |
| 1121 | 3.89   | 1120 | 4.11   | 1119 | 2.82   | 1135 | 0.63   | 1126 | 0.11   | 1126 | 0.72   |
| 1175 | 475.59 | 1175 | 477.79 | 1175 | 507.64 | 1181 | 509.61 | 1176 | 522.66 | 1175 | 483.43 |
| 1204 | 52.88  | 1217 | 32.46  | 1215 | 14.98  | 1219 | 10.07  | 1215 | 28.76  | 1202 | 50.63  |
| 1229 | 26.49  | 1222 | 11.61  | 1238 | 15.7   | 1233 | 23.36  | 1241 | 418.37 | 1230 | 23.63  |
| 1248 | 530.49 | 1253 | 10.93  | 1247 | 156.64 | 1250 | 256.39 | 1242 | 72.19  | 1249 | 474.99 |
| 1253 | 5.5    | 1255 | 564.09 | 1253 | 376.91 | 1253 | 275.57 | 1249 | 15.24  | 1253 | 8.98   |
| 1348 | 5.3    | 1336 | 3.06   | 1327 | 0.76   | 1334 | 1.97   | 1319 | 0.01   | 1358 | 1.92   |
| 1362 | 2.72   | 1366 | 0.28   | 1363 | 0.12   | 1369 | 1.21   | 1378 | 1.14   | 1387 | 23.68  |
| 1384 | 26.05  | 1382 | 28.4   | 1382 | 25.78  | 1380 | 25.48  | 1385 | 0.38   | 1389 | 4.09   |
| 1405 | 11.44  | 1400 | 7.43   | 1404 | 5.15   | 1406 | 2.04   | 1386 | 25.27  | 1397 | 17.81  |
| 1410 | 5.59   | 1413 | 3.03   | 1413 | 3.24   | 1414 | 5.09   | 1418 | 2.58   | 1424 | 6.57   |
| 1436 | 6.85   | 1436 | 20.8   | 1436 | 6.58   | 1436 | 12.63  | 1435 | 29.7   | 1436 | 25.53  |
| 1444 | 28.63  | 1440 | 13.03  | 1447 | 18.58  | 1442 | 11.17  | 1455 | 0.26   | 1450 | 13.65  |
| 1464 | 5.51   | 1463 | 6.74   | 1463 | 7.04   | 1463 | 6.57   | 1466 | 5.55   | 1466 | 6.81   |
| 1466 | 8.8    | 1467 | 3.18   | 1466 | 4.81   | 1464 | 5.06   | 1469 | 5.05   | 1468 | 5.71   |
| 1467 | 4.76   | 1470 | 9.07   | 1468 | 7.78   | 1474 | 4.13   | 1470 | 8.07   | 1477 | 8.42   |
| 1490 | 19.59  | 1489 | 22.94  | 1490 | 2.84   | 1490 | 17.54  | 1485 | 1.35   | 1490 | 5.75   |
| 1491 | 4.86   | 1492 | 6.23   | 1493 | 9.83   | 1490 | 1.49   | 1492 | 29.6   | 1494 | 0.75   |
| 1495 | 13.84  | 1498 | 1.43   | 1493 | 2.96   | 1495 | 5.55   | 1495 | 6.98   | 1496 | 4.25   |
| 1499 | 11.74  | 1502 | 15.2   | 1495 | 25.82  | 1497 | 21.69  | 1496 | 12.69  | 1504 | 23.37  |
| 1509 | 14.43  | 1505 | 10.46  | 1504 | 21.29  | 1507 | 9.43   | 1498 | 15.28  | 1507 | 27.02  |

|      |         |      |         |      |         |      |         |      |         |      |         |
|------|---------|------|---------|------|---------|------|---------|------|---------|------|---------|
| 1514 | 7.07    | 1509 | 13.55   | 1513 | 4.73    | 1509 | 10.5    | 1513 | 2.08    | 1519 | 18.42   |
| 1516 | 8.26    | 1523 | 20.71   | 1515 | 17.1    | 1519 | 7.65    | 1521 | 24.69   | 1524 | 6.37    |
| 1532 | 7.96    | 1538 | 7.51    | 1527 | 3.85    | 1532 | 34.01   | 1537 | 2.09    | 1533 | 22.64   |
| 1557 | 43.83   | 1556 | 39.76   | 1553 | 59.57   | 1540 | 42.75   | 1556 | 65.57   | 1566 | 41.29   |
| 1582 | 62      | 1582 | 58.67   | 1589 | 58.49   | 1604 | 74.97   | 1586 | 61.69   | 1590 | 75.35   |
| 2949 | 1899.74 | 2940 | 1965.84 | 2935 | 1828.76 | 2993 | 1621.75 | 2950 | 1885.06 | 2955 | 2039.41 |
| 3086 | 12.17   | 3084 | 10.06   | 3084 | 14.25   | 3082 | 12.64   | 3083 | 17.15   | 3085 | 8.32    |
| 3087 | 13.3    | 3085 | 15.16   | 3085 | 14.49   | 3090 | 24.18   | 3084 | 9.47    | 3093 | 10.57   |
| 3096 | 1       | 3099 | 1.03    | 3098 | 1.05    | 3101 | 0.93    | 3096 | 0.91    | 3093 | 0.49    |
| 3113 | 13.19   | 3105 | 8.41    | 3108 | 9.49    | 3104 | 12.55   | 3109 | 0.4     | 3108 | 9.93    |
| 3116 | 12.2    | 3119 | 14.07   | 3117 | 7.76    | 3115 | 7.64    | 3113 | 21.4    | 3115 | 7.71    |
| 3120 | 6.32    | 3128 | 10.81   | 3120 | 4.72    | 3129 | 2.16    | 3116 | 4.58    | 3117 | 28.57   |
| 3165 | 7.43    | 3164 | 12.31   | 3167 | 5.95    | 3165 | 11.71   | 3164 | 0.13    | 3165 | 1.96    |
| 3170 | 9.62    | 3167 | 6.01    | 3171 | 20.17   | 3172 | 9.65    | 3166 | 4.39    | 3170 | 9.83    |
| 3172 | 11.51   | 3175 | 18.27   | 3174 | 13.2    | 3175 | 20.57   | 3173 | 14.49   | 3171 | 17.36   |
| 3176 | 14.16   | 3180 | 15.35   | 3175 | 8.31    | 3181 | 12.52   | 3175 | 14.77   | 3178 | 22.47   |
| 3184 | 29.92   | 3184 | 24.9    | 3191 | 13.39   | 3187 | 6.94    | 3182 | 0.66    | 3183 | 20.61   |
| 3189 | 19.47   | 3189 | 15.71   | 3194 | 18.65   | 3193 | 21.52   | 3184 | 43.25   | 3193 | 26.83   |
| 3206 | 2.83    | 3210 | 2.66    | 3208 | 2.61    | 3211 | 4.03    | 3205 | 2.63    | 3204 | 2.62    |
| 3211 | 2.6     | 3210 | 4.84    | 3212 | 2.58    | 3213 | 2.8     | 3212 | 2.62    | 3208 | 2.65    |
| 3221 | 3.42    | 3214 | 2.89    | 3213 | 3.51    | 3214 | 2.64    | 3221 | 1.15    | 3209 | 3.67    |
| 3227 | 0.5     | 3216 | 0.66    | 3230 | 1.8     | 3219 | 0.83    | 3225 | 1.28    | 3224 | 0.75    |

### DEMA-TFO

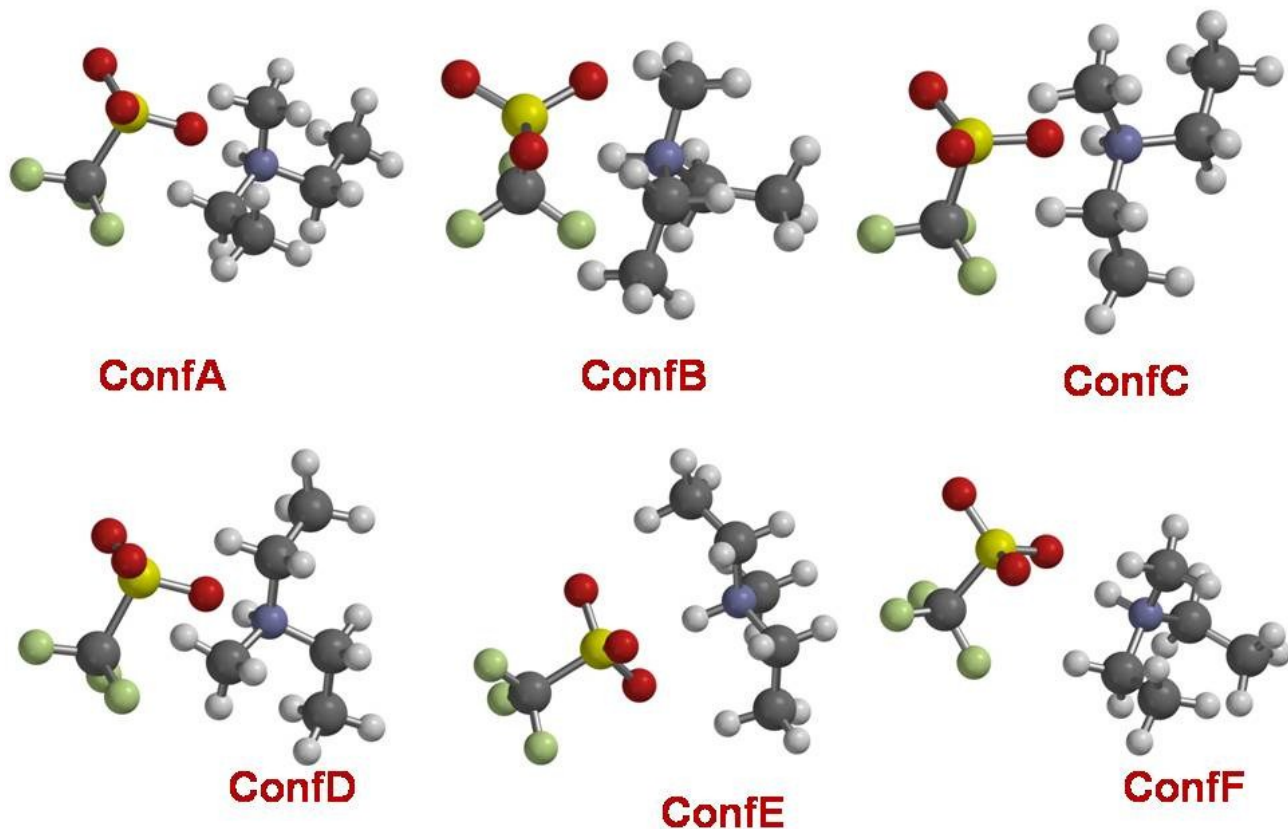

**Fig. S3.** Geometric structures of the six conformers of DEMA-TfO, calculated as ionic couples in a polar medium at the  $\omega$ B97X-D level of theory with the 6-31G\*\* basis set.

**Table S5.** Conformers of DEMA-TfO (calculated at the  $\omega$ B97X-D level of theory with the 6-31G\*\* basis set and a polar medium) and their relative energies.

| Conformer | $\Delta E$ (kJ/mol) | ZPE (kJ/mol) | Entropy (J/mol•K) | Enthalpy (a.u) | Gibbs Energy (a.u) |
|-----------|---------------------|--------------|-------------------|----------------|--------------------|
| C         | 0.00                | 589.68       | 570.00            | -1214.72686    | -1214.79158        |
| D         | 0.1                 | 589.06       | 572.04            | -1214.72702    | -1214.79198        |
| B         | 0.4                 | 590.12       | 563.90            | -1214.72655    | -1214.79059        |
| A         | 2.5                 | 589.60       | 570.13            | -1214.72598    | -1214.79072        |
| E         | 6.1                 | 587.97       | 551.83            | -1214.72513    | -1214.78779        |
| F         | 12.0                | 590.17       | 563.90            | -1214.72213    | -1214.78617        |

**Table S6.** Infrared vibrational frequencies ( $\omega$  in  $\text{cm}^{-1}$ ) and intensities (I in  $\text{km/mol}$ ) of the six conformers of DEMA-TfO calculated at the  $\omega$ B97X-D level of theory with the 6-31G\*\* basis set and a polar medium.

| ConfA    |        | ConfB    |        | ConfC    |        | ConfD    |        | ConfE    |        | ConfF    |        |
|----------|--------|----------|--------|----------|--------|----------|--------|----------|--------|----------|--------|
| $\omega$ | I      |
| 23       | 2.48   | 24       | 3.46   | 15       | 3.72   | 14       | 1.61   | 7        | 4.59   | 22       | 6.92   |
| 34       | 5.39   | 42       | 7.99   | 37       | 0.37   | 41       | 7.08   | 26       | 7.71   | 38       | 1.96   |
| 47       | 1.03   | 51       | 0.96   | 45       | 9.01   | 46       | 2.37   | 47       | 5.36   | 51       | 3.26   |
| 60       | 4.3    | 57       | 2.9    | 52       | 4.67   | 56       | 4.71   | 56       | 1.66   | 55       | 4.72   |
| 73       | 5.49   | 71       | 4.96   | 78       | 3.08   | 66       | 3.67   | 60       | 3.76   | 73       | 7.73   |
| 81       | 2.92   | 83       | 2.29   | 85       | 8      | 86       | 1.57   | 75       | 2.3    | 82       | 9.87   |
| 91       | 10.62  | 97       | 7.87   | 103      | 1.62   | 92       | 2.49   | 91       | 0.96   | 119      | 3.31   |
| 111      | 1.38   | 142      | 8.51   | 136      | 25.48  | 125      | 5.75   | 95       | 10.93  | 134      | 17.19  |
| 146      | 37.34  | 148      | 35.6   | 146      | 12.33  | 147      | 41.97  | 132      | 20.99  | 150      | 20.64  |
| 201      | 4.86   | 201      | 4.13   | 205      | 4.56   | 202      | 5.85   | 196      | 3.14   | 204      | 5.98   |
| 204      | 0.54   | 205      | 3.23   | 210      | 2.97   | 203      | 3.08   | 208      | 2.69   | 206      | 1.5    |
| 205      | 2.35   | 225      | 0.48   | 218      | 1.19   | 234      | 0.28   | 222      | 3.98   | 238      | 1      |
| 239      | 3.39   | 253      | 0.21   | 253      | 1.24   | 249      | 0.37   | 238      | 4.54   | 274      | 0.19   |
| 286      | 0.4    | 280      | 1.09   | 262      | 3.14   | 263      | 2.23   | 267      | 2.33   | 282      | 0.37   |
| 309      | 0.86   | 301      | 0.03   | 294      | 0.27   | 282      | 0.12   | 281      | 0.1    | 310      | 0.42   |
| 316      | 2.89   | 316      | 2.58   | 318      | 3.86   | 316      | 2.64   | 324      | 7.56   | 317      | 2.65   |
| 342      | 0.59   | 342      | 0.54   | 342      | 0.78   | 343      | 0.47   | 344      | 0.68   | 329      | 0.23   |
| 344      | 1.04   | 345      | 0.51   | 352      | 6.22   | 348      | 2.96   | 352      | 1.78   | 342      | 0.74   |
| 350      | 5.57   | 352      | 6.6    | 374      | 1.4    | 356      | 3.7    | 357      | 8.19   | 351      | 6.41   |
| 419      | 0.56   | 426      | 0.73   | 432      | 1.58   | 429      | 1.24   | 415      | 0.67   | 415      | 1.14   |
| 452      | 3.37   | 482      | 1.32   | 468      | 2.67   | 469      | 4.35   | 470      | 13.25  | 449      | 0.14   |
| 506      | 40.7   | 506      | 41.66  | 502      | 11.01  | 499      | 5.25   | 493      | 0.18   | 506      | 41.29  |
| 515      | 54.37  | 515      | 53.84  | 508      | 33.6   | 507      | 34.99  | 504      | 43.38  | 515      | 56.85  |
| 571      | 12.52  | 560      | 12.25  | 516      | 55.17  | 517      | 58.12  | 506      | 35.45  | 572      | 11.78  |
| 574      | 18.7   | 573      | 17.49  | 574      | 14.06  | 575      | 12.53  | 572      | 10.76  | 577      | 23.32  |
| 586      | 21.15  | 580      | 22.65  | 578      | 19.52  | 578      | 25.71  | 575      | 9.3    | 618      | 240.54 |
| 619      | 261.29 | 619      | 260.65 | 622      | 275.61 | 619      | 267.37 | 628      | 304.09 | 627      | 34.29  |
| 777      | 5.58   | 771      | 3.65   | 778      | 6.11   | 778      | 6.34   | 779      | 7.31   | 754      | 1.18   |
| 791      | 2.4    | 777      | 4.95   | 785      | 6.16   | 783      | 4.49   | 804      | 10.7   | 777      | 5.95   |
| 823      | 17.66  | 816      | 14.78  | 823      | 11.14  | 818      | 10.36  | 813      | 0.01   | 816      | 7.99   |
| 834      | 7.26   | 847      | 9.94   | 850      | 19.11  | 848      | 17.97  | 850      | 16.74  | 829      | 17.67  |
| 914      | 2.1    | 914      | 0.15   | 924      | 3.13   | 921      | 2.11   | 915      | 8.04   | 900      | 1.27   |
| 998      | 6.75   | 1013     | 13.61  | 1019     | 33.73  | 1015     | 9.06   | 1008     | 18.09  | 995      | 7.56   |
| 1032     | 275.62 | 1029     | 265.92 | 1029     | 264.12 | 1030     | 286.17 | 1029     | 338.96 | 1033     | 279.81 |
| 1060     | 53.54  | 1058     | 42.63  | 1058     | 66.42  | 1057     | 57.18  | 1039     | 72.45  | 1068     | 41.85  |

|      |        |      |        |      |        |      |        |      |        |      |         |
|------|--------|------|--------|------|--------|------|--------|------|--------|------|---------|
| 1074 | 19.46  | 1076 | 27.18  | 1078 | 24.89  | 1076 | 23.17  | 1081 | 17.62  | 1077 | 32.7    |
| 1100 | 18.66  | 1095 | 14.45  | 1095 | 5.34   | 1094 | 7.58   | 1089 | 9.55   | 1101 | 17.8    |
| 1106 | 7.92   | 1106 | 6.79   | 1108 | 8.43   | 1105 | 6.71   | 1110 | 7.95   | 1104 | 8.48    |
| 1122 | 2.19   | 1123 | 3.04   | 1120 | 2.48   | 1118 | 3.74   | 1122 | 0.23   | 1126 | 1.3     |
| 1205 | 2.36   | 1215 | 57.72  | 1213 | 14.88  | 1212 | 16.91  | 1210 | 12.46  | 1194 | 36.28   |
| 1226 | 160.25 | 1221 | 23.68  | 1224 | 124.96 | 1226 | 195.59 | 1225 | 111.59 | 1227 | 224.24  |
| 1228 | 217.96 | 1226 | 299.05 | 1231 | 380.28 | 1229 | 344.3  | 1237 | 281.32 | 1229 | 60.56   |
| 1232 | 4.93   | 1228 | 81.02  | 1239 | 554.51 | 1238 | 55.34  | 1238 | 689.73 | 1232 | 94.51   |
| 1240 | 711.15 | 1238 | 631.97 | 1240 | 38.82  | 1240 | 486.5  | 1240 | 3.59   | 1241 | 693.11  |
| 1254 | 20.05  | 1252 | 25.4   | 1248 | 37.27  | 1247 | 31.94  | 1243 | 29.31  | 1249 | 3.7     |
| 1265 | 126.24 | 1265 | 127.4  | 1265 | 118.44 | 1267 | 130.02 | 1267 | 132.33 | 1267 | 131.03  |
| 1296 | 581.35 | 1293 | 588.53 | 1300 | 552.68 | 1300 | 556.59 | 1291 | 503.61 | 1300 | 571.78  |
| 1348 | 7.43   | 1338 | 6.18   | 1328 | 4.09   | 1327 | 4.13   | 1320 | 0.26   | 1360 | 3.62    |
| 1364 | 3.33   | 1369 | 0.28   | 1371 | 1.65   | 1370 | 1.38   | 1380 | 1.42   | 1385 | 1.04    |
| 1409 | 14.01  | 1403 | 8.31   | 1411 | 3.48   | 1407 | 4.69   | 1385 | 0.05   | 1396 | 22.65   |
| 1410 | 1.4    | 1417 | 1.56   | 1413 | 4.8    | 1411 | 4.33   | 1417 | 2.21   | 1426 | 3.96    |
| 1438 | 3.81   | 1439 | 25.04  | 1441 | 6.08   | 1438 | 4.84   | 1434 | 27.82  | 1434 | 22.94   |
| 1446 | 32.89  | 1444 | 13.88  | 1449 | 16.69  | 1444 | 14.89  | 1453 | 1.7    | 1449 | 20.36   |
| 1467 | 9.01   | 1476 | 5.89   | 1468 | 7.67   | 1470 | 6.38   | 1461 | 10.59  | 1470 | 15.33   |
| 1489 | 22.71  | 1490 | 28.83  | 1488 | 4.52   | 1488 | 2.69   | 1483 | 5.99   | 1489 | 7.03    |
| 1490 | 3.29   | 1494 | 8.62   | 1493 | 7.74   | 1490 | 12.58  | 1488 | 30.49  | 1493 | 3.37    |
| 1495 | 14.85  | 1499 | 0.6    | 1494 | 10.03  | 1492 | 13.13  | 1494 | 8.19   | 1496 | 3.4     |
| 1502 | 11.08  | 1501 | 12.66  | 1497 | 23.84  | 1497 | 21.93  | 1496 | 8.57   | 1503 | 13.03   |
| 1509 | 10.74  | 1505 | 8.61   | 1501 | 23.45  | 1502 | 25.24  | 1497 | 18.06  | 1508 | 24.76   |
| 1515 | 14.95  | 1515 | 6.03   | 1515 | 8.15   | 1511 | 9.99   | 1513 | 5.44   | 1510 | 7.15    |
| 1517 | 7.51   | 1523 | 28.51  | 1515 | 8.08   | 1515 | 7.65   | 1515 | 10.44  | 1523 | 10.99   |
| 1533 | 7.39   | 1541 | 6.61   | 1532 | 16.21  | 1527 | 26.84  | 1526 | 5.05   | 1529 | 25.47   |
| 1544 | 43.91  | 1545 | 48.26  | 1543 | 50.68  | 1534 | 41.73  | 1539 | 65.5   | 1541 | 48.42   |
| 1570 | 58.54  | 1569 | 55.53  | 1564 | 60.57  | 1568 | 52.98  | 1556 | 69.86  | 1558 | 31.88   |
| 3088 | 11.39  | 3084 | 11.52  | 3080 | 11.57  | 3082 | 11.53  | 3087 | 12.06  | 3089 | 11.64   |
| 3089 | 15.58  | 3086 | 16.19  | 3089 | 12.16  | 3084 | 10.72  | 3088 | 6.17   | 3092 | 26.47   |
| 3116 | 97.1   | 3114 | 70.54  | 3111 | 129.95 | 3111 | 98.11  | 3111 | 210.06 | 3112 | 50.64   |
| 3120 | 46.77  | 3120 | 76.19  | 3113 | 63.9   | 3117 | 116.71 | 3115 | 38.74  | 3114 | 12.54   |
| 3125 | 13.5   | 3138 | 8.52   | 3122 | 58.26  | 3122 | 28.65  | 3119 | 50.82  | 3127 | 13.62   |
| 3163 | 898.58 | 3161 | 729.48 | 3164 | 135.03 | 3167 | 38.04  | 3159 | 892.29 | 3161 | 1290.44 |
| 3171 | 245.56 | 3168 | 435.17 | 3165 | 611.95 | 3168 | 865.73 | 3168 | 33.57  | 3167 | 23.09   |
| 3173 | 47.52  | 3170 | 29.2   | 3173 | 228.11 | 3170 | 27.32  | 3172 | 102.44 | 3172 | 18.81   |
| 3176 | 11.41  | 3176 | 21.53  | 3177 | 21.9   | 3178 | 33.27  | 3180 | 6.6    | 3174 | 23.4    |
| 3184 | 14.75  | 3179 | 26.33  | 3178 | 41.71  | 3182 | 48.31  | 3181 | 15.28  | 3182 | 21.45   |
| 3193 | 28.91  | 3189 | 26.24  | 3190 | 12.85  | 3194 | 14.64  | 3187 | 9.27   | 3187 | 24.36   |
| 3194 | 14.98  | 3199 | 13.48  | 3199 | 22.73  | 3198 | 25.62  | 3192 | 40.08  | 3199 | 12.69   |
| 3226 | 3.35   | 3221 | 3.7    | 3221 | 7.25   | 3220 | 7.03   | 3225 | 3.02   | 3216 | 2.81    |
| 3228 | 4.36   | 3231 | 4.16   | 3230 | 2.68   | 3236 | 2.26   | 3233 | 1.3    | 3232 | 5.25    |

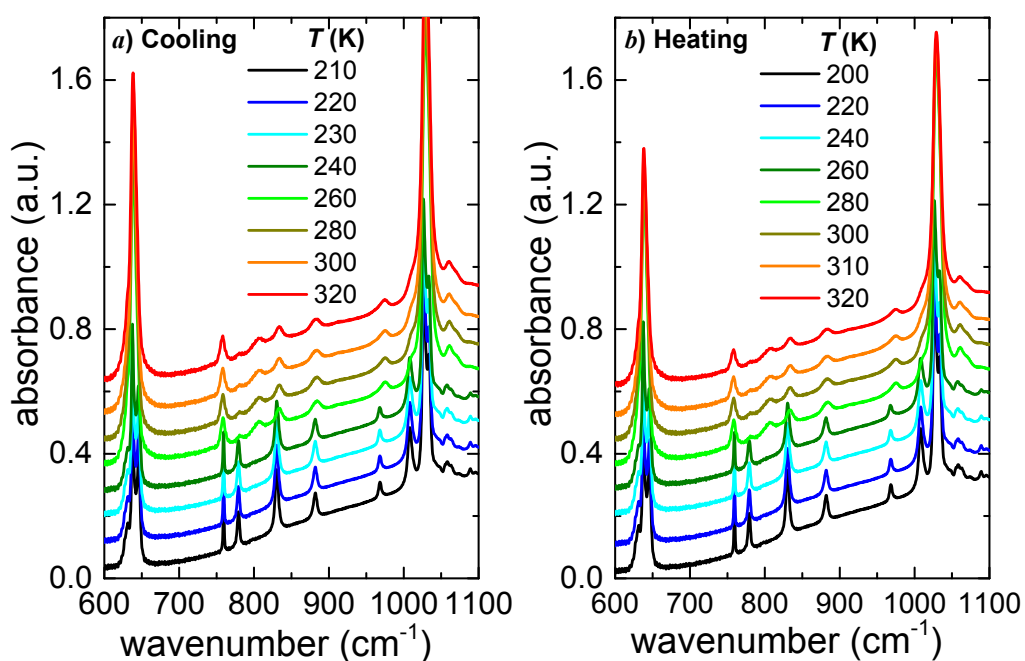

**Fig. S4.** Experimental spectra of the DEMA-TfO sample between 600 and 1100 cm<sup>-1</sup> measured on cooling (panel a) and subsequent heating (panel b).

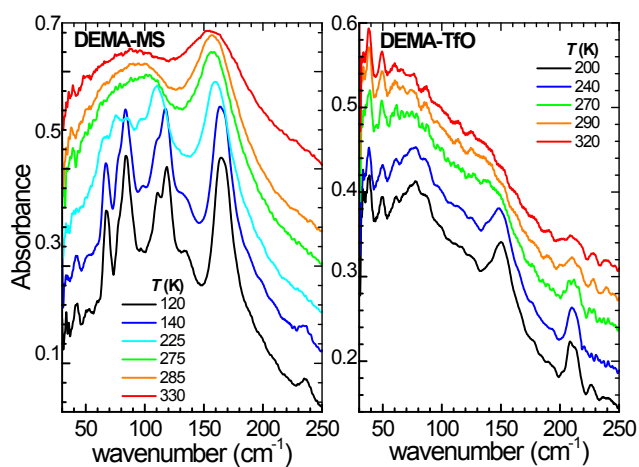

**Fig. S5.** Temperature dependence of the far infrared spectra of DEMA-MS and DEMA-TfO samples.



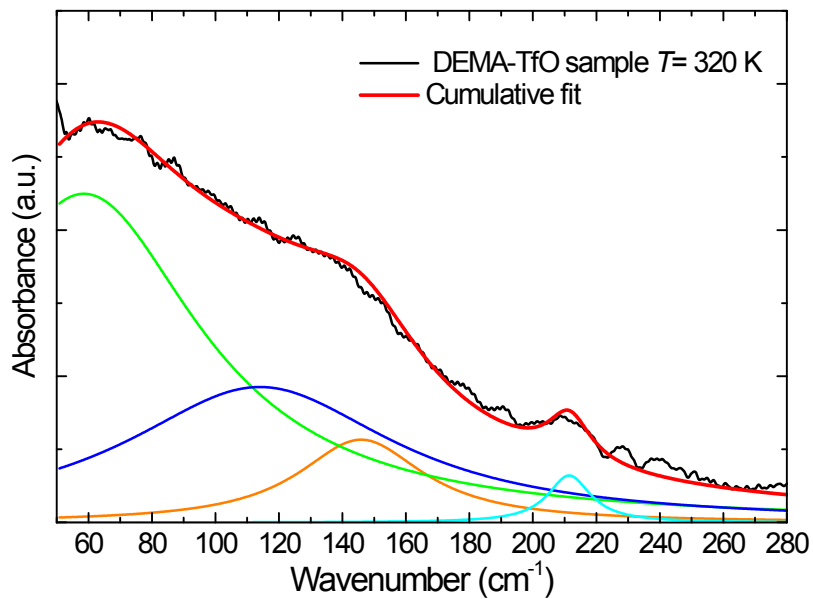

**Fig. S6.** Measured far infrared spectrum of DEMA-TfO at 320 K (black line) and deconvolution by means of a fit to a sum (red line) of individual gaussians (other colors) as described in the text.

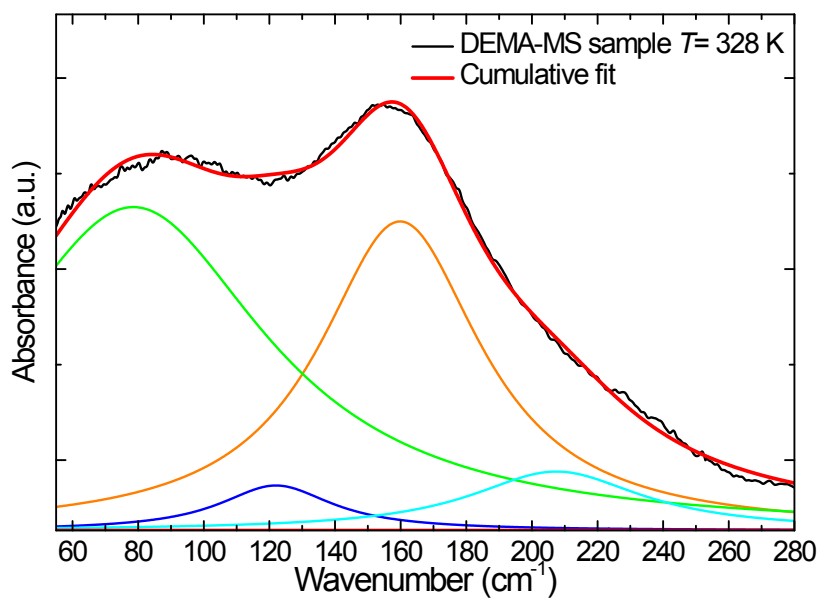

**Fig. S7.** Measured far infrared spectrum of DEMA-TfO sample at 320 K (black line) and deconvolution by means of a fit to a sum (red line) of individual gaussians (other colors) as described in the text.
